# Supplementary material for: Ba2Bi2[Zn(PO4)4]: ionic-isolation-activated first barium bismuth zincophosphate with unprecedented ∞[Zn(PO4)4]10− chains and balanced overall performance
Source: Royal Society of Chemistry journal article supplement (doi:10.1039/d1qi01273h), 2021-11-24

Supporting Information

# **Ba<sub>2</sub>Bi<sub>2</sub>[Zn(PO<sub>4</sub>)<sub>4</sub>]: Ionic-Isolation-Activated First Barium Bismuth Zincophosphate with Unprecedented $\infty$ [Zn(PO<sub>4</sub>)<sub>4</sub>]<sup>10-</sup> Chains and Balanced Overall Performance**

Yu-Xin Li<sup>a, #</sup>, Mei-Hong Duan<sup>\*a, #</sup>, Pei-Xin Ma<sup>a</sup>, Xu-Kui Yang<sup>a</sup>, Wen-Hua Ma<sup>a</sup>, Bai-Chuan Wang<sup>a</sup> and Zhi Fang<sup>\*b</sup>

<sup>a</sup> College of Physics and Astronomy, China West Normal University, Nanchong 637002, Sichuan, China, E-mail: duanmeihong@126.com.

<sup>b</sup> State Key Laboratory of Structural Chemistry, Fujian Institute of Research on the Structure of Matter, Chinese Academy of Sciences, Fuzhou, Fujian 350002, P. R. China. E-mail: zfang@fjirsm.ac.cn

# These authors contributed equally

## **CONTENTS**

|                                                                                                 |    |
|-------------------------------------------------------------------------------------------------|----|
| <b>Table S1.</b> Atomic coordinates and equivalent isotropic displacement parameters for BBZPO. | S2 |
| <b>Table S2.</b> Anisotropic displacement parameters, in Å <sup>2</sup> , for atoms in BBZPO.   | S3 |
| <b>Table S3.</b> Selected bond lengths for BBZPO.                                               | S4 |
| <b>Table S4.</b> Selected bond angles for BBZPO.                                                | S5 |
| <b>Table S5.</b> Calculated bond valence sum (BVS) for atoms in BBZPO.                          | S6 |
| <b>Figure S1.</b> IR spectrum for BBZPO.                                                        | S7 |

**Table S1.** Atomic coordinates and equivalent isotropic displacement parameters for BBZPO.

| Atom | Wyck | Site | x/a         | y/b         | z/c         | U [Å <sup>2</sup> ] |
|------|------|------|-------------|-------------|-------------|---------------------|
| Bi1  | 8d   | 1    | 0.56166(3)  | 0.61306(2)  | 0.32924(2)  | 0.00777(11)         |
| Ba1  | 8d   | 1    | 0.91275(5)  | 0.39142(3)  | 0.38812(4)  | 0.01142(13)         |
| Zn1  | 4c   | 2    | 0.25455(14) | 1/4         | 0.34571(12) | 0.0138(3)           |
| P3   | 4c   | 2    | 0.5928(3)   | 1/4         | 0.4322(2)   | 0.0066(5)           |
| P2   | 4c   | 2    | 0.1337(3)   | 1/4         | 0.6015(2)   | 0.0094(6)           |
| P1   | 8d   | 1    | 0.2677(2)   | 0.47664(12) | 0.39393(17) | 0.0079(4)           |
| O7   | 4c   | 2    | 0.3044(9)   | 1/4         | 0.5917(8)   | 0.0222(19)          |
| O1   | 8d   | 1    | 0.3990(6)   | 0.5100(4)   | 0.3126(5)   | 0.0192(13)          |
| O6   | 4c   | 2    | 0.0743(8)   | 1/4         | 0.4579(7)   | 0.0133(16)          |
| O10  | 4c   | 2    | 0.7418(8)   | 1/4         | 0.3546(6)   | 0.0098(15)          |
| O9   | 8d   | 1    | 0.5921(6)   | 0.3317(3)   | 0.5166(5)   | 0.0176(13)          |
| O2   | 8d   | 1    | 0.1310(6)   | 0.5330(3)   | 0.3740(5)   | 0.0144(12)          |
| O8   | 4c   | 2    | 0.4706(9)   | 1/4         | 0.3299(7)   | 0.0179(18)          |
| O3   | 8d   | 1    | 0.3031(6)   | 0.4791(3)   | 0.5404(4)   | 0.0162(12)          |
| O4   | 8d   | 1    | 0.2345(6)   | 0.3880(3)   | 0.3418(5)   | 0.0143(12)          |
| O5   | 8d   | 1    | 0.0820(8)   | 0.3304(5)   | 0.6671(6)   | 0.0400(19)          |

**Table S2.** Anisotropic displacement parameters, in Å<sup>2</sup>, for atoms in BBZPO.

| Atom | U <sub>11</sub> | U <sub>22</sub> | U <sub>33</sub> | U <sub>12</sub> | U <sub>13</sub> | U <sub>23</sub> |
|------|-----------------|-----------------|-----------------|-----------------|-----------------|-----------------|
| Bi1  | 0.00982(18)     | 0.00649(16)     | 0.00701(16)     | 0.00025(10)     | -0.00027(10)    | 0.00029(10)     |
| Ba1  | 0.0125(3)       | 0.0084(2)       | 0.0134(2)       | 0.00019(17)     | -0.00197(16)    | -0.00077(17)    |
| Zn1  | 0.0108(7)       | 0.0161(7)       | 0.0146(6)       | 0.00000         | 0.0035(5)       | 0.00000         |
| P3   | 0.0066(14)      | 0.0058(13)      | 0.0075(12)      | 0.00000         | 0.0013(9)       | 0.00000         |
| P2   | 0.0116(16)      | 0.0091(13)      | 0.0075(12)      | 0.00000         | 0.0044(10)      | 0.00000         |
| P1   | 0.0076(11)      | 0.0088(9)       | 0.0073(9)       | 0.0002(7)       | -0.0004(7)      | 0.0005(7)       |
| O7   | 0.008(5)        | 0.016(4)        | 0.043(5)        | 0.00000         | -0.005(3)       | 0.00000         |
| O1   | 0.018(3)        | 0.018(3)        | 0.021(3)        | -0.006(2)       | 0.007(2)        | 0.000(2)        |
| O6   | 0.017(5)        | 0.014(4)        | 0.008(3)        | 0.00000         | -0.004(3)       | 0.00000         |
| O10  | 0.004(4)        | 0.016(4)        | 0.009(3)        | 0.00000         | -0.002(3)       | 0.00000         |
| O9   | 0.021(3)        | 0.013(3)        | 0.018(3)        | -0.003(2)       | 0.007(2)        | -0.012(2)       |
| O2   | 0.014(3)        | 0.015(3)        | 0.014(3)        | 0.006(2)        | -0.002(2)       | 0.000(2)        |
| O8   | 0.007(4)        | 0.031(5)        | 0.016(4)        | 0.00000         | -0.003(3)       | 0.00000         |
| O3   | 0.023(3)        | 0.022(3)        | 0.003(2)        | 0.007(2)        | -0.001(2)       | 0.000(2)        |
| O4   | 0.013(3)        | 0.010(3)        | 0.020(3)        | -0.003(2)       | 0.005(2)        | -0.002(2)       |
| O5   | 0.059(5)        | 0.034(4)        | 0.027(4)        | 0.018(4)        | 0.008(3)        | -0.016(3)       |

**Table S3.** Selected bond lengths for BBZPO.

| <b>Atoms 1,2</b>      | <b>d 1,2 [Å]</b> | <b>Atoms 1,2</b> | <b>d 1,2 [Å]</b> |
|-----------------------|------------------|------------------|------------------|
| Bi1—O7 <sup>i</sup>   | 2.5924(45)       | Zn1—O8           | 1.9474(82)       |
| Bi1—O1                | 2.1876(59)       | Zn1—O4           | 2.1760(47)       |
| Bi1—O9 <sup>i</sup>   | 2.2604(52)       | P3—O10           | 1.5530(74)       |
| Bi1—O3 <sup>i</sup>   | 2.3072(47)       | P3—O9            | 1.5433(50)       |
| Bi1—O5 <sup>iii</sup> | 2.2722(68)       | P3—O8            | 1.511(8)         |
| Ba1—O6 <sup>iv</sup>  | 2.7467(42)       | P2—O7            | 1.5366(85)       |
| Ba1—O10               | 2.7223(42)       | P2—O6            | 1.5521(74)       |
| Ba1—O2 <sup>iv</sup>  | 2.9686(50)       | P2—O5            | 1.5016(76)       |
| Ba1—O2 <sup>i</sup>   | 2.7192(50)       | P1—O1            | 1.5321(57)       |
| Ba1—O3 <sup>i</sup>   | 2.9025(50)       | P1—O2            | 1.5274(55)       |
| Ba1—O4 <sup>iv</sup>  | 2.9287(54)       | P1—O3            | 1.5208(45)       |
| Zn1—O6                | 1.9795(73)       | P1—O4            | 1.5194(51)       |

**Table S4.** Selected bond angles for BBZPO.

| Atoms 1,2,3                             | Angle 1,2,3 [°] | Atoms 1,2,3                            | Angle 1,2,3 [°] |
|-----------------------------------------|-----------------|----------------------------------------|-----------------|
| O1—Bi1—O7 <sup>i</sup>                  | 161.480(155)    | O8—Zn1—O4 <sup>vi</sup>                | 90.692(12)      |
| O1—Bi1—O9 <sup>i</sup>                  | 85.959(189)     | O8—Zn1—O4                              | 94.645(142)     |
| O1—Bi1—O2 <sup>ii</sup>                 | 118.954(142)    | O7—P2—O6                               | 106.396(427)    |
| O1—Bi1—O3 <sup>i</sup>                  | 86.067(192)     | O5 <sup>vi</sup> —P2—O7                | 85.125(16)      |
| O1—Bi1—O5 <sup>iii</sup>                | 81.612(233)     | O5—P2—O7                               | 109.715(274)    |
| O9 <sup>i</sup> —Bi1—O7 <sup>i</sup>    | 75.561(123)     | O5—P2—O6                               | 108.063(237)    |
| O9 <sup>i</sup> —Bi1—O2 <sup>ii</sup>   | 93.428(136)     | O5 <sup>vi</sup> —P2—O6                | 104.167(14)     |
| O9 <sup>i</sup> —Bi1—O3 <sup>i</sup>    | 99.540(173)     | O5 <sup>vi</sup> —P2—O5                | 27.858(289)     |
| O9 <sup>i</sup> —Bi1—O5 <sup>iii</sup>  | 90.241(212)     | O2—P1—O1                               | 110.439(307)    |
| O2 <sup>ii</sup> —Bi1—O7 <sup>i</sup>   | 62.037(24)      | O3—P1—O1                               | 110.919(276)    |
| O3 <sup>i</sup> —Bi1—O7 <sup>i</sup>    | 95.681(119)     | O3—P1—O2                               | 106.430(288)    |
| O3 <sup>i</sup> —Bi1—O2 <sup>ii</sup>   | 33.813(118)     | O4—P1—O1                               | 106.085(318)    |
| O5 <sup>iii</sup> —Bi1—O7 <sup>i</sup>  | 99.398(184)     | O4—P1—O2                               | 109.117(282)    |
| O5 <sup>iii</sup> —Bi1—O2 <sup>ii</sup> | 159.297(169)    | O4—P1—O3                               | 113.877(278)    |
| O5 <sup>iii</sup> —Bi1—O3 <sup>i</sup>  | 163.694(205)    | O10 <sup>v</sup> —Zn1—O4               | 94.207(138)     |
| O6—Zn1—O10 <sup>v</sup>                 | 102.416(213)    | O10 <sup>v</sup> —Zn1—O4 <sup>vi</sup> | 82.392(11)      |
| O6—Zn1—O4 <sup>vi</sup>                 | 83.835(12)      | O8—Zn1—O6                              | 149.609(320)    |
| O6—Zn1—O4                               | 86.720(139)     | O8—Zn1—O10 <sup>v</sup>                | 47.193(237)     |

(i) 1-x, 1-y, 1-z; (ii) 1.5+x, y, 1.5-z; (iii) 0.5-x, 1-y, -0.5+z; (iv) 1+x, y, z;

(v) 0.5+x, y, 1.5-z; (vi) 0.5-x, 1.5+y, 0.5+z; (vii) -0.5-x, 1.5+y, 0.5+z; (viii) -1-x, 0.5+y, -z;

(ix) -1+x, y, z; (x) 1.5+x, -0.5-y, 1.5-z; (xi) 0.5-x, 1-y, 0.5+z.

**Table S5.** Calculated bond valence sum (BVS) for atoms in BBZPO.

| <b>Atom</b> | <b>BVS</b> |
|-------------|------------|
| Ba1         | 2.02       |
| Bi1         | 3.19       |
| Zn1         | 2.07       |
| P1          | 5.46       |
| P2          | 5.17       |
| P3          | 4.97       |
| O1          | -2.31      |
| O2          | -2.08      |
| O3          | -2.05      |
| O4          | -1.98      |
| O5          | -1.98      |
| O6          | -2.24      |
| O7          | -1.87      |
| O8          | -2.03      |
| O9          | -1.86      |
| O10         | -2.21      |

Bond valence sums are calculated by using bond-valence theory ( $S_i = \exp[(R_o - R_i)/B]$ , where  $R_o$  is an empirical constant,  $R_i$  is the length of bond  $i$  (in angstroms), and  $B = 0.37$ ).

Figure S1. IR Spectrum for BBZPO.

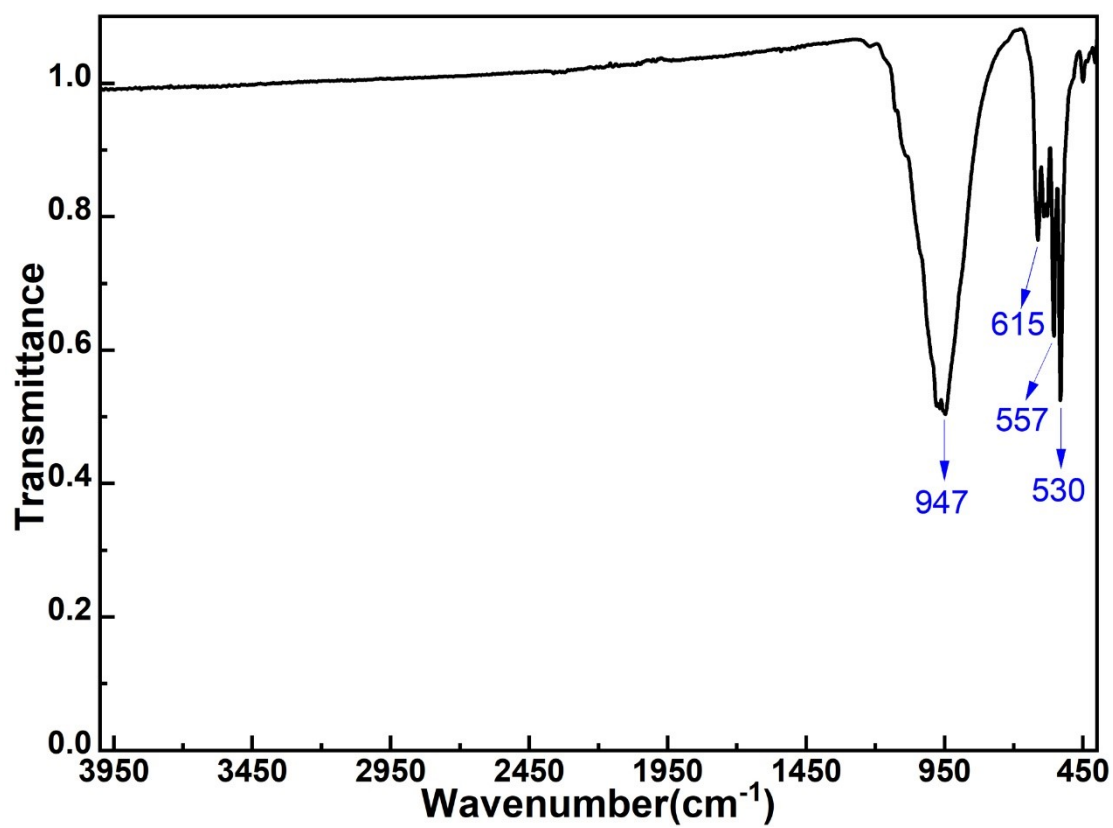

Supplement: d1qi01273h1.pdf [file d1qi01273h1.pdf]
